# Supplementary material
Source: publisher site journal article supplement (https://www.dovepress.com/article/263977)
Supplement: Supplementary file 1 [file get_supplementary_file.php]

## Supplementary Figure 1

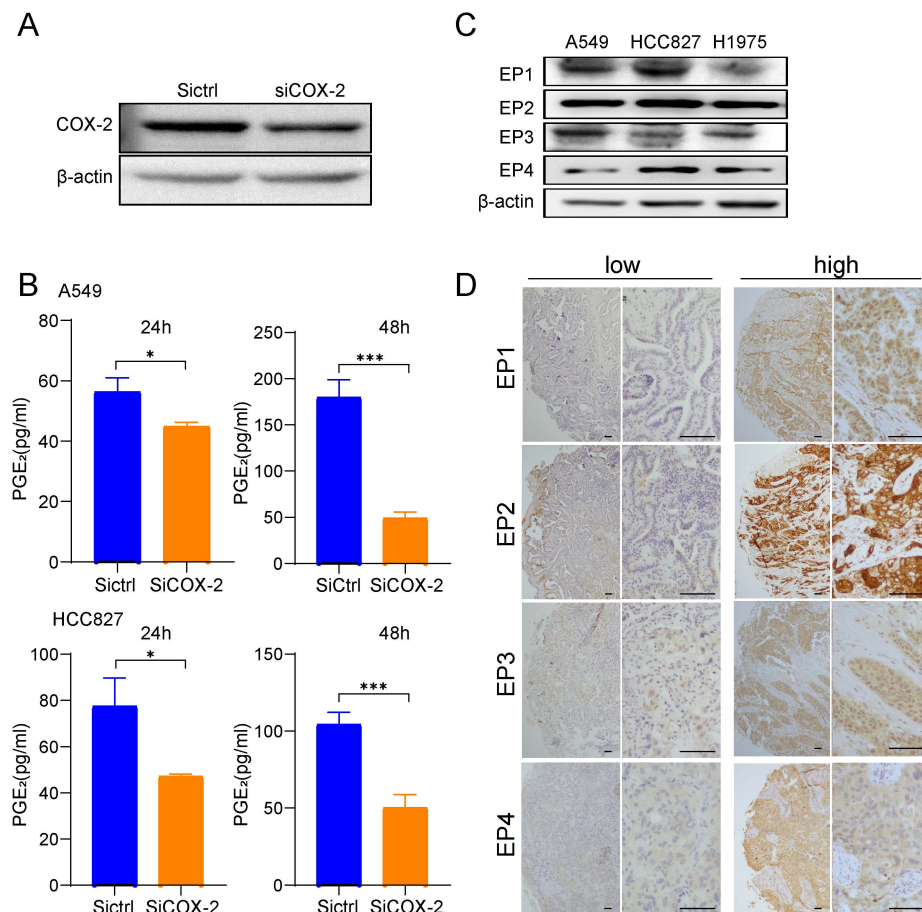

**Figure S1. (A)** HCC827 cells were treated with SiRNA-COX-2 or SiRNA-control for 48 h. COX-2 expression was analyzed by immunoblotting. **(B)** A549 and HCC827 cells were treated with SiRNA-COX-2 or SiRNA-control for 24h and 48 h, and expression levels of PGE<sub>2</sub> were measured by ELISA assay. The Data are presented as the mean  $\pm$  SD (\* $p < 0.05$ , \*\*\* $p < 0.001$ ). **(C)** The expression of EP receptors in A549, HCC827 and H1975 cells as assessed by immunoblotting. **(D)** Expression of EP receptors in tumor specimens detected by immunohistochemistry, scale bar=100 $\mu$ M.

## Supplementary Figure 2

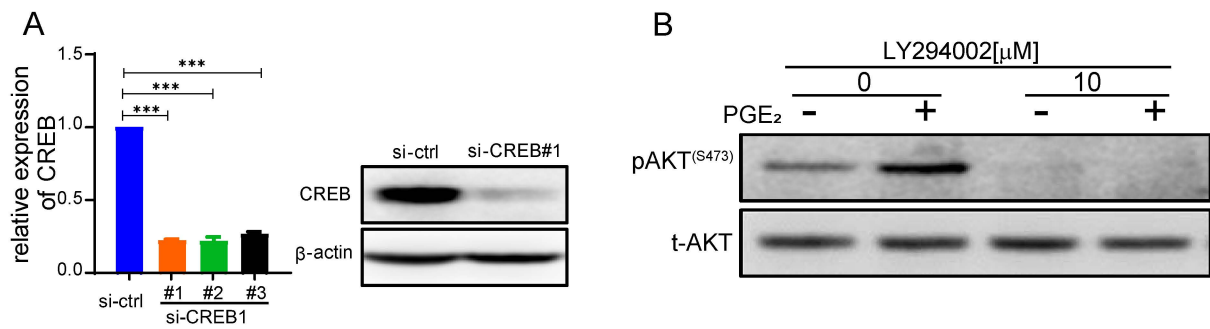

**Figure S2. (A)** HCC827 cells were treated with siRNA-CREB or siRNA-control. CREB expression at the mRNA (24 h) and protein (48 h) levels was assessed by RT-PCR and immunoblotting, respectively. The Data are presented as the mean  $\pm$  SD (\*\* $p < 0.001$ ). **(B)** HCC827 cells were pre-treated with LY294002 for 45 min and then stimulated with PGE<sub>2</sub> for 30 min. AKT phosphorylation was analyzed by immunoblotting. LY294002 at a concentration of 10  $\mu$ M inhibited PGE<sub>2</sub>-induced AKT phosphorylation.

Supplementary Figure 3

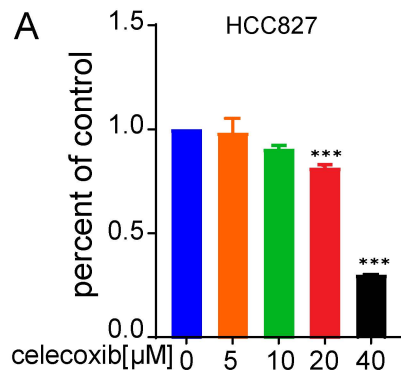

**Figure S3.** The effect of Celecoxib on cell proliferation. HCC827 cells ( $5 \times 10^3$  cells/well) were stimulated with the indicated concentration of celecoxib for 72 h. Cell proliferation was evaluated using a CCK-8 assay. Untreated cells served as controls. The Data are presented as the mean  $\pm$  SD (\*\* $p < 0.001$ ).

**Supplementary Table 1. Sequences of PCR primers**

|                |         |                               |
|----------------|---------|-------------------------------|
| COX-2          | Forward | 5'-TGCTTGTCTGGAACAACACTGC-3'  |
|                | Reverse | 5'-TGAGCATCTACGGTTTGCTG-3'    |
| CREB           | Forward | 5'- CCACTGTAACGGTGCCAACACT-3' |
|                | Reverse | 5'-GCTGCATTGGTCATGGTTAATGT-3' |
| $\beta$ -actin | Forward | 5'-TGACGTGGACATCCGCAAAG-3'    |
|                | Reverse | 5'-TCTTCATTGTGCTGGGTGCC-3'    |
| EP1            | Forward | 5'-GGCCAGCTTGTCGGTATCAT-3'    |
|                | Reverse | 5'-GCCACCAACACCAGCATTG-3'     |
| EP2            | Forward | 5'-GGAGGGCGCATCTCTTTTC-3'     |
|                | Reverse | 5'-GGAGTCATTGGAGGCATTGC-3'    |
| EP3            | Forward | 5'-CCTTCAAGGTTCTGTGCTCAGC-3'  |
|                | Reverse | 5'-CATCAGCTTAGCTGGACACTGC-3'  |
| EP4            | Forward | 5'-GCAGCACGTCGGATGCTA-3'      |
|                | Reverse | 5'-TCTTCGCAGCCATCAAGTTG-3'    |

**Supplementary Table 2. List of Antibodies**

| <b>Protein</b>            | <b>Clone</b> | <b>Applications</b> | <b>Working dilution</b> | <b>Supplier</b>             | <b>Catalog Number</b> |
|---------------------------|--------------|---------------------|-------------------------|-----------------------------|-----------------------|
| phospho-AKT(S473)         | D9E          | WB                  | 1:2000                  | Cell Signaling Technologies | 4060                  |
| phospho-ERK1/2(T202/Y204) | D13.14.4E    | WB                  | 1:1000                  | Cell Signaling Technologies | 4370                  |
| phospho-AKT1(S473)        | D7F10        | WB                  | 1:1000                  | Cell Signaling Technologies | 9018                  |
| AKT1                      | 2H10         | WB                  | 1:1000                  | Cell Signaling Technologies | 2967                  |
| phospho-AKT2(S474)        | D3H2         | WB                  | 1:1000                  | Cell Signaling Technologies | 8599                  |
| AKT2                      | F-7          | WB                  | 1:200                   | Santa cruz                  | sc-5270               |
| Phospho-AKT3(S472)        | Polyclonal   | WB                  | 1:500                   | Abcepta                     | AP3468a               |
| AKT3                      | GMA104       | WB                  | 1:5000                  | Merck                       | 05-780                |
| $\beta$ -actin            | 8H10D10      | WB                  | 1:1000                  | Cell Signaling Technologies | 3700                  |
| Phospho-CREB(Ser133)      | E113         | WB                  | 1:5000                  | Abcam                       | 32096                 |
| CREB                      | 48H2         | WB                  | 1:1000                  | Cell Signaling Technologies | 9197                  |
| COX2                      | D5H5         | WB                  | 1:1000                  | Cell Signaling Technologies | 12282                 |
| COX2                      | D5H5         | IHC                 | 1:400                   | Cell Signaling Technologies | 12282                 |
| EP1                       | 61-160/402   | WB                  | 1:500                   | GeneTex                     | GTX50972              |
| EP1                       | 61-160/402   | IHC                 | 1:400                   | GeneTex                     | GTX50972              |
| EP2                       | EPR8030      | WB                  | 1:2000                  | Abcam                       | 167171                |
| EP2                       | EPR8030      | IHC                 | 1:800                   | Abcam                       | 167171                |
| EP3                       | Polyclonal   | WB                  | 1:2000                  | Origene                     | TA313293S             |
| EP3                       | Polyclonal   | IHC                 | 1:200                   | Origene                     | TA313293S             |
| EP4                       | Polyclonal   | WB                  | 1:1000                  | LSBio                       | A3898                 |
| EP4                       | Polyclonal   | IHC                 | 1:400                   | LSBio                       | A3898                 |

**Supplementary Table 3. Clinicopathological variables and the expression status of COX-2 in tumor tissues**

| Characteristic                      | Percentage (%) | COX-2      |           | P †      |
|-------------------------------------|----------------|------------|-----------|----------|
|                                     |                | high(n=37) | low(n=72) |          |
| <b>Gender</b>                       |                |            |           |          |
| Male                                | 54.1           | 23         | 37        | 0.3150   |
| Female                              | 45.9           | 14         | 35        |          |
| <b>Age</b>                          |                |            |           |          |
| <60                                 | 61.5           | 25         | 42        | 0.4090   |
| ≥60                                 | 38.5           | 12         | 30        |          |
| <b>Smoking history</b>              |                |            |           |          |
| Never-smoker                        | 59.6           | 20         | 46        | 0.4082   |
| Smoker                              | 40.4           | 17         | 26        |          |
| <b>Tumor stage</b>                  |                |            |           |          |
| Stage I                             | 32.1           | 6          | 29        | 0.0106*  |
| Stage II                            | 31.2           | 11         | 23        |          |
| Stage IIIA                          | 36.7           | 20         | 20        |          |
| <b>Pathologic lymph node status</b> |                |            |           |          |
| Negative                            | 57.8           | 13         | 49        | 0.0010** |
| Positive                            | 42.2           | 24         | 23        |          |
| <b>EGFR mutation</b>                |                |            |           |          |
| Wild type                           | 42.2           | 19         | 27        | 0.3249   |
| Mutated                             | 50.5           | 15         | 40        |          |
| Unknown                             | 7.3            | 3          | 5         |          |

†:  $\chi^2$  test; \* P < 0.05, \*\*P < 0.01.

**Supplementary Table 4. The correlation between PGE<sub>2</sub> receptors and COX-2**

| Gene | R Correlation(COX-2) | P value |
|------|----------------------|---------|
| EP1  | 0.7373               | <0.0001 |
| EP2  | 0.5331               | <0.0001 |
| EP3  | 0.6188               | <0.0001 |
| EP4  | 0.4840               | <0.0001 |

†: Pearson test
